# Supplementary material
Source: publisher figshare collection journal article supplement (https://future-science-group.figshare.com/ndownloader/files/27699516)
Supplement: Supplementary file 1 [file 27699516]

**Supplementary table 4. Associations of CpG sites within the three DMRs with SNPs and INDELs in the GoDMC database.**

| DMR1 | Chr2 | Start3 | End3 | Gene Name3 | CpG sites in DMR | Number of SNP & INDELs associations in cis | Number of SNP & INDELs associations in trans |
| --- | --- | --- | --- | --- | --- | --- | --- |
| 1 | 2 | 177053274 | 177053496 | *HOXD1* | cg05099387 | 0 | 0 |
|  |  |  |  |  | cg02150988 | 35 | 0 |
|  |  |  |  |  | cg19180624 | 0 | 0 |
|  |  |  |  |  | cg23420260 | 0 | 0 |
|  |  |  |  |  | cg19542816 | 0 | 0 |
|  |  |  |  |  | cg19001226 | 0 | 0 |
|  |  |  |  |  | cg03450948 | 36 | 0 |
| 2 | 22 | 38092643 | 38093207 | *TRIOBP* | cg10921709 | 970 | 0 |
|  |  |  |  |  | cg11679014 | 810 | 0 |
|  |  |  |  |  | cg11540735 | 622 | 0 |
|  |  |  |  |  | cg14268632 | 694 | 0 |
|  |  |  |  |  | cg12325455 | 506 | 0 |
|  |  |  |  |  | cg06644488 | 1002 | 0 |
|  |  |  |  |  | cg06594770 | 573 | 0 |
|  |  |  |  |  | cg05691152 | 709 | 0 |
|  |  |  |  |  | cg12379720 | 635 | 0 |
|  |  |  |  |  | cg13897416 | 790 | 0 |
| 3 | 7 | 158937969 | 158938060 | *VIPR2* | cg23572908 | 0 | 0 |
|  |  |  |  |  | cg25189564 | 2 | 0 |
|  |  |  |  |  | cg20673829 | 8 | 0 |

1 DMR= differentially methylated region

2 Chr = Chromosome

3 Annotation were perfomed via IlluminaHumanMethylation450kanno.ilmn12.hg19. Homo sapiens (human) genome assembly GRCh37 (hg19). *HansenKD(2016). IlluminaHumanMethylation450kanno.ilmn12.hg19: Annotation for Illumina's 450k methylation arrays. R package version 0.6.0*

4 SNP = single nucleotide polymorphisms.

5 INDEL = insertion and deletion of nucleotides
